# Supplementary material for: An online tool for survival prediction of extrapulmonary small cell carcinoma with random forest
Source: Front Oncol. 2023 Jun 29;13:1166424. doi: 10.3389/fonc.2023.1166424 (PMC10346459; doi:10.3389/fonc.2023.1166424)
Supplement: Supplementary file 2 [file Table_2.xlsx]

## Sheet: TableS2
Table S2. Data source of the external validation of this study.
Title	Site/System	First Author	Publication Year	DOI/PMID	Cases	Others
A case of primary small cell carcinoma of the liver that was treated with chemotherapy	Digestive	Morikawa H	2008	19669327	1	liver
A case of small cell carcinoma of the kidney	Urinary	Miyake M	2007	17515073	1	kidney
A case of uterine cervical adenocarcinoma associated with small cell carcinoma	Female Genital	Kamiya M	2008	19012708	1	cervix uteri
A rare case of primary malignant small cell carcinoma combined with urothelial cell carcinoma in the ureter	Urinary	Jang H	2013	23927752	1	ureter
Case of metastatic small cell carcinoma of the oropharynx successfully treated with image-guided volumetric modulated arc therapy (IG-VMAT): pushing the limits of technology to match treatment intent	Head&Neck	Ahmad I	2018	30567165	1	Oropharyngeal
Composite small cell and mucinous carcinoma oriDigestic Systemnating from the intrahepatic bile duct: report of a case	Digestive	Ikegami T	2013	23001532	1	intrahepatic bile duct
Extrapulmonary Small Cell Carcinoma - a Case Series of Oropharyngeal and Esophageal Primary Sites Treated with Chemo-Radiotherapy	Digestive+Head&Neck	Sahai P	2015	26514485	4	Oropharyngeal and Esophageal
Extrapulmonary small cell carcinoma of the anal canal: a case report and review of the literature	Digestive	Eberhardt JM	2012	22454644	1	intestinal
Extrapulmonary small cell carcinoma of the external auditory canal: a case report and review of the literature	Head&Neck	Wang J	2020	32851892	1	Head&Neck
Extrapulmonary Small Cell Carcinoma Presenting as an Orbital Mass: A Case Report	Head&Neck	Meinhardt AL	2022	35734026	1	Head&Neck
Locally advanced anal small cell carcinoma with durable complete response to chemoradiation followed by consolidation chemotherapy: case report and literature review	Digestive	Chuang J	2021	35070438	1	intestinal
Low back pain revealing a primary small cell neuroendocrine carcinoma of the upper urinary tract: A case report and review of the literature	Urinary	Tombet CA	2020	32835003	1	ureter
p16 positive oropharyngeal small cell cancer: A case report	Head&Neck	Al Masalmeh N	2021	34187735	1	Oropharyngeal
Primary Gastric Small Cell Carcinoma (Presenting as Linitis Plastica) Diagnosed Using Endoscopic Ultrasound-Guided Biopsy: A Case Report	Digestive	Cha RR	2019	30300982	1	stomach
Primary mixed adenocarcinoma and small-cell carcinoma of appendix: A case report (CARE-compliant)	Digestive	Kim WS	2019	31083256	1	intestinal
Primary small cell carcinoma of kidney after renal transplantation: a case report and literature review	Urinary	Lee HY	2013	24255587	1	kidney
Primary small cell carcinoma with neuroendocrine properties of the mandible: A case report and literature review	Head&Neck	Chen Y	2017	30895083	1	Head&Neck
Primary Ureteral Thyroid Transcription Factor 1-Positive Small Cell Neuroendocrine Carcinoma: Case Report and Review of the Literature	Urinary	Acosta AM	2015	26162396	1	Ureter
Rectal small cell carcinoma: a case report and review of the literature	Digestive	Spiliopoulou P	2011	22114573	1	intestinal
Small Cell Cancer of the Genitourinary Tract: A Case Report and Review of the Literature	Urinary	Yeung HM	2017	28690522	1	ureter
Small Cell Carcinoma of Prostate: A Case Report of a Patient With Concomitant Transitional Cell Cancer of the Bladder	Urinary	Abusnina W	2018	29536021	1	bladder
Small cell carcinoma of the larynx treated by concurrent chemoradiotherapy: a case report	Head&Neck	Nakahara S	2012	22953108	1	larynx
Small cell carcinoma of the renal pelvis: a case report and review of the literature	Urinary	Patil S	2011	22084805	1	renal pelvis
Small cell carcinoma of the tonsil treated with irinotecan and Cisplatin: a case report and literature review	Head&Neck	Segawa Y	2011	22220155	1	tonsil
Small cell neuroendocrine carcinoma of the ampulla of Vater with foci of squamous differentiation: a case report	Digestive	Sugawara G	2004	15747032	1	duodenum
Small-cell carcinoma of the ovary with Breast metastases: a case report	Female Genital	Reckova M	2010	20192073	1	ovary
Hemodialysis patient with primary small cell carcinoma of the bladder treated with CPT-11 and CBDCA. Case report	Urinary	Tatsuya Ishii	2011	https://doi.org/10.4009/jsdt.44.79	1	bladder
Four cases of small cell carcinoma of the urinary bladder	Urinary	Hirokatsu Moriai	2015	https://doi.org/10.14932/jamt.14-73	4	bladder
Two long-term surviving cases of primary gastric small cell carcinoma with a literature review	Digestive	Rie Kobayashi	2009	https://doi.org/10.3919/jjsa.70.2347	2	stomach
A case of small cell carcinoma of the pancreas	Digestive	Hideki Yamada	2012	https://doi.org/10.3919/jjsa.73.1524	1	pancrea
A case of small cell carcinoma of the gallbladder	Digestive	Takahiro Sasaki	2010	https://doi.org/10.3919/jjsa.71.2129	1	bile bladder
Two cases of prostate small cell carcinoma whose survival was prolonged with radiochemotherapy (translated)	Prostate	Kikuchi Hiroshi	2010	https://doi.org/10.5980/jpnjurol.101.431_3	2	Prostate
Recurrence of Neuroendocrine Small Cell Carcinoma During Postoperative Chemotherapy in a Patient Who Received Radiation Therapy Successfully	Female Genital	Shoko Kozaki	2014	https://doi.org/10.2185/jjrm.62.768	1	corpus uteri
Small cell carcinoma of the prostate: a case report of relative long-term survival	Prostate	Masaru Hirai	2015	https://doi.org/10.5980/jpnjurol.106.280	1	Prostate
Five-year survival of gastric small cell carcinoma after multidiscriplinary therapy-a case report	Digestive	Masanori Takeda	2010	https://doi.org/10.3919/jjsa.71.1779	1	stomach
A case of primary ureteral small cell carcinoma (translated)	Urinary	OGUCHI	2007	https://doi.org/10.5980/jpnjurol.98.429_2	1	ureter
Three cases of prostate small cell carcinoma (translated)	Prostate	TAKAHASHI	2008	https://doi.org/10.5980/jpnjurol.99.421_3	2	Prostate
A case of small cell carcinoma of the breast	Breast	Juichiro Konishi	2007	https://doi.org/10.3919/jjsa.68.2207	1	Breast
A case of small-cell carcinoma endocrine cell carcinoma of the ampulla of vater	Digestive	Masashi Hirota	2008	https://doi.org/10.3919/jjsa.69.824	1	duodenum
A case of radical resection for small cell carcinoma of the bile duct	Digestive	Hirofumi Sato	2015	https://doi.org/10.3919/jjsa.76.2293	1	stomach
A case of small cell carcinoma of the ampulla of vater	Digestive	Tomonari Asano	2008	https://doi.org/10.3919/jjsa.69.375	1	duodenum
A case of breast small cell carcinoma treated with a breast-conserving surgery after neoadjuvant chemotherapy	Breast	Jun Hamaguchi	2008	https://doi.org/10.3919/jjsa.73.3072	1	Breast
Two cases of small cell carcinoma of the head and neck	Head&Neck	Yoshinori Takizawa	2014	https://doi.org/10.5106/jjshns.24.223	2	1 paranasal sinus; 1 larynx
Two cases of bladder small cell carcinoma in complete remission (translated)	Urinary	Miyazaki Jun	2009	https://doi.org/10.5980/jpnjurol.100.327_3	2	bladder
A case of early gastric small cell carcinoma with micrometastasis of lymph node	Digestive	Hidenori Akaike	2010	https://doi.org/10.3919/jjsa.71.690	1	stomach
A case of gastric small cell carcinoma	Digestive	Toru Aoyama	2009	https://doi.org/10.3919/jjsa.70.1987	1	stomach
Small cell carcinoma cases (translated)	Head&Neck	Akira Hara	2013	https://doi.org/10.11453/orltokyo.56.s69	7	3 nasal cavity&paranasal sinus; 2 larynx; 1 pharynx; 1 salivary gland
A case of early gastric small cell carcinoma	Digestive	Toshihiro Otsuka	2010	https://doi.org/10.3919/jjsa.71.928	1	stomach
Successful treatment with multidiscriplinary therapy including low-dose chemoradiotherapy against metastatic recurrences of small cell carcinoma of the renal pelvis: a case report	Urinary	Hiroshi Fukushima	2011	https://doi.org/10.5980/jpnjurol.102.638	1	renal pelvis
A case of cervical small cell carcinoma diagnosed by cervical cytology	Female Genital	Saimi Nogi	2012	https://doi.org/10.5795/jjscc.51.369	1	cervix uteri
A case of primary small cell carcinoma of the endometrial	Female Genital	Kanako Wakui	2009	https://doi.org/10.5795/jjscc.48.404	1	corpus uteri
