# Supplementary material for: An online tool for survival prediction of extrapulmonary small cell carcinoma with random forest
Source: Front Oncol. 2023 Jun 29;13:1166424. doi: 10.3389/fonc.2023.1166424 (PMC10346459; doi:10.3389/fonc.2023.1166424)
Supplement: Supplementary file 3 [file Table_3.xlsx]

## Sheet: Sheet1
Table S3. Comparison of patient characteristics between SEER data and external validation cohort.
Variable		Training		Internal Validation		p value	External Validation
		N	%	N	%		N	%
Age	Minors(0-19)	13	0.00473761	10	0.00849618	0.418	0	0
	Young Adults(20-44)	227	0.0827259	116	0.0985556		5	0.0735294
	Middle-aged(45-59)	544	0.198251	217	0.184367		27	0.397059
	Elderlies(60+)	1960	0.714286	834	0.708581		36	0.529412
Gender	Female	1156	0.421283	491	0.417162	0.811	23	0.338235
	Male	1588	0.578717	686	0.582838		45	0.661765
Site	Digestive	846	0.308309	367	0.31181	0.828	20	0.294118
	Urinary	892	0.325073	368	0.312659	0.446	17	0.25
	Female Genital	420	0.153061	185	0.157179	0.744	5	0.0735294
	Prostate	254	0.0925656	107	0.0909091	0.869	5	0.0735294
	Head & Neck	263	0.0958455	117	0.0994053	0.73	19	0.279412
	Breast	69	0.0251458	33	0.0280374	0.602	2	0.0294118
TNM Stage	I	284	0.103499	121	0.102804	0.824	10	0.147059
	II	471	0.171647	192	0.163127		15	0.220588
	III	378	0.137755	164	0.139337		21	0.308824
	IV	1300	0.473761	554	0.470688		22	0.323529
Summary Stage	Localized	671	0.244534	282	0.239592	0.968	30	0.441176
	Regional	702	0.255831	292	0.248088		25	0.367647
	Distant	1193	0.434767	505	0.429057		13	0.191176
Surgey	No/unknow	1318	0.480321	585	0.497026	0.703	28	0.411765
	Yes, with LN resection	524	0.190962	214	0.181818		26	0.382353
	Yes, no record of LN resection	902	0.328717	378	0.321155		14	0.205882
Chemotherapy	No/unknow	1034	0.376822	457	0.388275	0.498	13	0.191176
	Yes	1710	0.623178	720	0.611725		53	0.779412
Radiotherapy	No/unknow	1848	0.673469	793	0.673747	0.986	32	0.470588
	Yes	896	0.326531	384	0.326253		36	0.529412
Total		7813	2.8473	37	0.0314359		37	0.544118
Follow-up months (median)		10 (4,28)		10 (3,27)		0.72	14 (9,30)
1-year OS		44.4%±1.0%		42.9%±1.4%		0.976	59.4%±0.9%
