# Supplementary material for: An online tool for survival prediction of extrapulmonary small cell carcinoma with random forest
Source: Front Oncol. 2023 Jun 29;13:1166424. doi: 10.3389/fonc.2023.1166424 (PMC10346459; doi:10.3389/fonc.2023.1166424)
Supplement: Supplementary file 4 [file Table_4.xlsx]

## Sheet: Sheet1
Table S4. AUC of different machine learning algorithm tested (before feature selection).
Method	AUC （95% CI）
	0.5-year OS	1-year OS	2-year OS	3-year OS	4-year OS	5-year OS
6th AJCC Stage	0.647(0.613,0.681)	0.680(0.643,0.717)	0.705(0.667,0.743)	0.733(0.688,0.778)	0.739(0.699,0.779)	0.750(0.710,0.790)
Random Forest	0.736(0.691,0.781)	0.745(0.712,0.778)	0.775(0.745,0.805)	0.800(0.771,0.829)	0.797(0.762 ,0.832)	0.784(0.752 ,0.816)
Logistc Regression	0.713(0.702,0.724)	0.712(0.705,0.719)	0.770(0.762,0.778)	0.783(0.770,0.796)	0.768(0.758 ,0.778)	0.778(0.769 ,0.784)
Support Vector Machine	0.690(0.684,0.696)	0.703(0.693,0.713)	0.769(0.755,0.783)	0.787(0.769,0.805)	0.770(0.753, 0.797)	0.755(0.700,0.811)
Naive Bayesian	0.717(0.713,0.721)	0.719(0.715,0.723)	0.765(0.758,0.772)	0.760(0.754 ,0.766)	0.795(0.787 ,0.803)	0.756(0.751 ,0.761)
XGBoost	0.724(0.714,0.734)	0.745(0.723,0.767)	0.783(0.775,0.791)	0.818(0.799,0.837)	0.785(0.767,0.803)	0.776(0.763,0.787)
